# Supplementary material for: Origin of ργ/T scaling of primary and secondary conductivity relaxation times in mixture of water with protic ionic liquid
Source: Royal Society of Chemistry journal article supplement (doi:10.1039/d4cp01959h), 2024-01-01
Supplement: d4cp01959h1.pdf [file d4cp01959h1.pdf]

## Supplementary Information

### Origin of the $\rho/T$ scaling of conductivity relaxation and water relaxation times in a mixture of water with protic ionic liquid

K. L. Ngai

CNR-IPCF, Institute for Chemical and Physical Processes,

Largo B. Pontecorvo 3, I-56127 Pisa, Italy

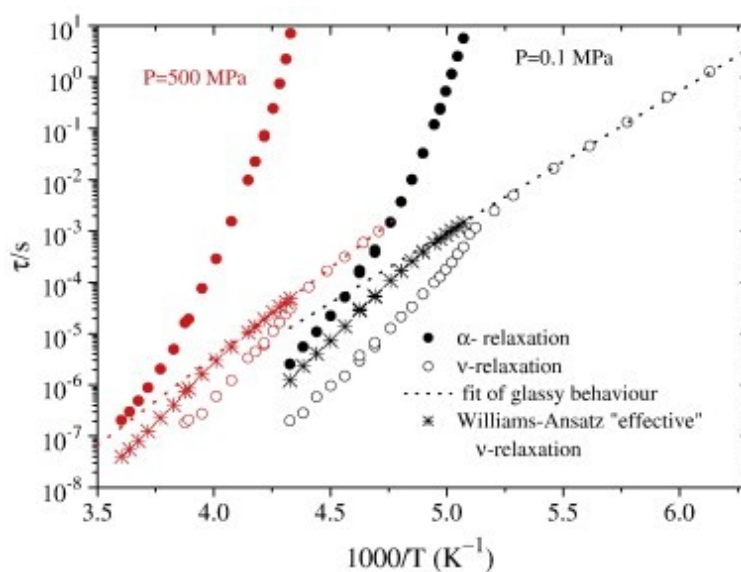

Fig. S1. Semilog Plot of relaxation times vs. reciprocal  $T$  of 26 wt.% fraction of water in PPG400. Close and open circles indicate  $\alpha$ - and  $v$ -processes, respectively. Asterisks are the relaxation times of the "effective" relaxation obtained from the convolution procedure indicated by the Williams ansatz. Black and red symbols indicate isobaric scan done at  $P=0.1$  and 500 MPa, respectively. Dotted lines are Arrhenius fits to the data in the glassy state. Figure reproduced from Ref.[S1] by permission from Elsevier.

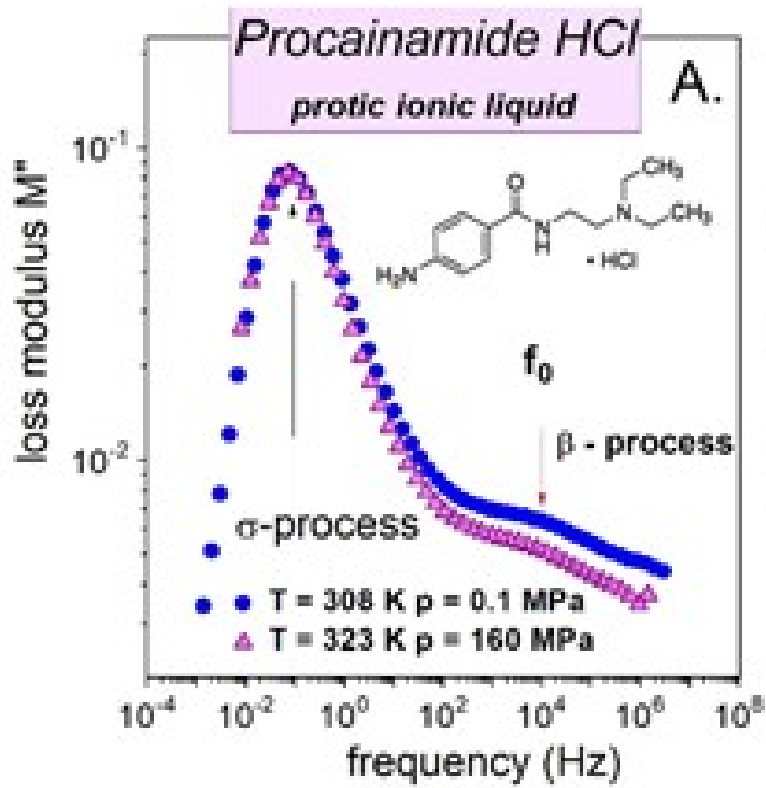

Fig. S2. Comparison of electric loss modulus spectra recorded at different temperature and pressure combinations and constant loss peak frequency for procainamide HCl with data from Ref.[S2] replotted.

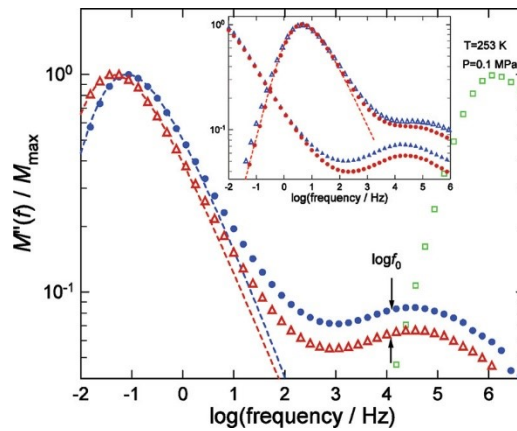

Fig. S3. Normalized  $M''(f)$  spectra of [Si-MIm][BF<sub>4</sub>] at different combinations of  $P$  and  $T$  to show co-invariance of  $\tau_\alpha$ ,  $\tau_\beta$ , and  $n$  at constant  $\tau_\alpha$ . Red open triangles ( $P=600 \text{ MPa}$ ,  $T=253 \text{ K}$ ). Blue circles ( $P=0.1 \text{ MPa}$ ,  $T=213 \text{ K}$ ). Green open squares ( $P=0.1 \text{ MPa}$ ,  $T=253 \text{ K}$ ). Blue and red lines are fits by Fourier transform of stretched exponential correlation function with  $n=0.43$ . The inset show

co-invariance at two more constant values of  $\tau_\alpha$ . Blue triangles are data at ambient pressure and  $T=218$  and  $208$  K from right to left. Red filled circles are data at constant  $T=253$  K and  $P=300$  MPa and  $500$  MPa from right to left. The arrows indicate the locations of the logarithm of the primitive conductivity relaxation frequencies,  $\log f_0$ , which agree with the most probable  $\beta$ -conductivity relaxation frequencies within a factor of about 2. Figure reproduced from Ref.[S3] by permission from ACS.

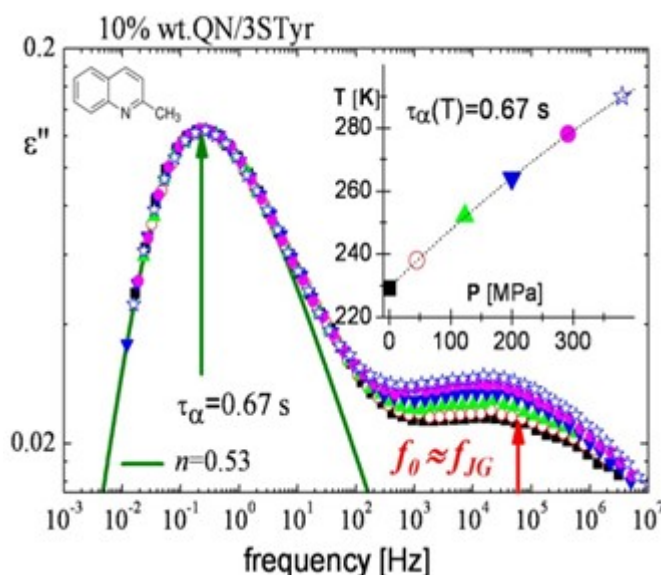

Fig. S4.  $T$ - $P$  superposition of loss spectra for 10% QN in tristyrene measured for different  $T$  and  $P$  combinations but the same  $\tau_\alpha = 0.67$  s. The line is a Fourier transformed of the Kohlrausch function with  $\beta_{\text{KWW}} \equiv (1-n) = 0.53$ . The results demonstrate the co-invariance of three quantities,  $\tau_\alpha$ ,  $n$ , and  $\tau_{\text{JG}}$ , to widely different combinations of  $T$  and  $P$ . Data of Kessaire et al. [S4] replotted.

## References

- S1. S. Capaccioli, K.L. Ngai, S. Ancherbak, P.A. Rolla, and N. Shinyashiki, The role of primitive relaxation in the dynamics of aqueous mixtures, nano-confined water and hydrated proteins, *J. Non-Cryst. Solids* 2011, **357**, 641–654.
- S2. Z. Wojnarowska, A. Swiety-Pospiech, K. Grzybowska, L. Hawelek, M. Paluch, and K. L. Ngai Fundamentals of ionic conductivity relaxation gained from study of procaine hydrochloride and procainamide hydrochloride at ambient and elevated pressure. *J. Chem. Phys.* 2012, **136**, 164507.

- S3. G. Jarosz, M. Mierzwa, J. Ziolo, M. Paluch, H. Shirota, and K. L. Ngai, Glass transition dynamics of room-temperature ionic liquid 1-methyl-3-trimethylsilylmethylimidazolium tetrafluoroborate. *J. Phys. Chem. B* 201, **115**, 12709–16.
- S4. K. Kessairi, S. Capaccioli, D. Prevosto, M. Lucchesi, S. Sharifi, and P. A. Rolla. Interdependence of primary and Johari-Goldstein secondary relaxations in glass-forming systems. *J. Phys. Chem. B* 2008, **112**, 4470.
